# Supplementary material for: Heat-resistant and robust biobased benzoxazine resins developed with a green synthesis strategy
Source: Royal Society of Chemistry journal article supplement (doi:10.1039/d0py01529f), 2020-12-09
Supplement: d0py01529f1.pdf [file d0py01529f1.pdf]

## Heat-resistant and robust biobased benzoxazine resins developed with a green synthesis strategy

Xin-Long Sha, Li Yuan, Guozheng Liang,\* Aijuan Gu\*

State and Local Joint Engineering Laboratory for Novel Functional Polymeric Materials

College of Chemistry, Chemical Engineering and Materials Science

Soochow University, 199 Ren' Ai Road, Suzhou 215123, China

### Index

|                                                                                                                          |    |
|--------------------------------------------------------------------------------------------------------------------------|----|
| <b>Fig. S1</b> HRM (ESI <sup>+</sup> ) spectrum of <b>IE-apa</b> .....                                                   | S2 |
| <b>Fig. S2</b> HRM (ESI <sup>+</sup> ) spectrum of <b>V-apa</b> .....                                                    | S3 |
| <b>Table S1</b> Thermal performances of biobased benzoxazine resins from mono-phenols in this work and literatures. .... | S4 |

---

\* Corresponding author. Tel: +86 512 65880967. Fax: +86 512 65880089. E-mail address: lgzheng@suda.edu.cn (Guozheng Liang), or, ajgu@suda.edu.cn (Aijuan Gu).

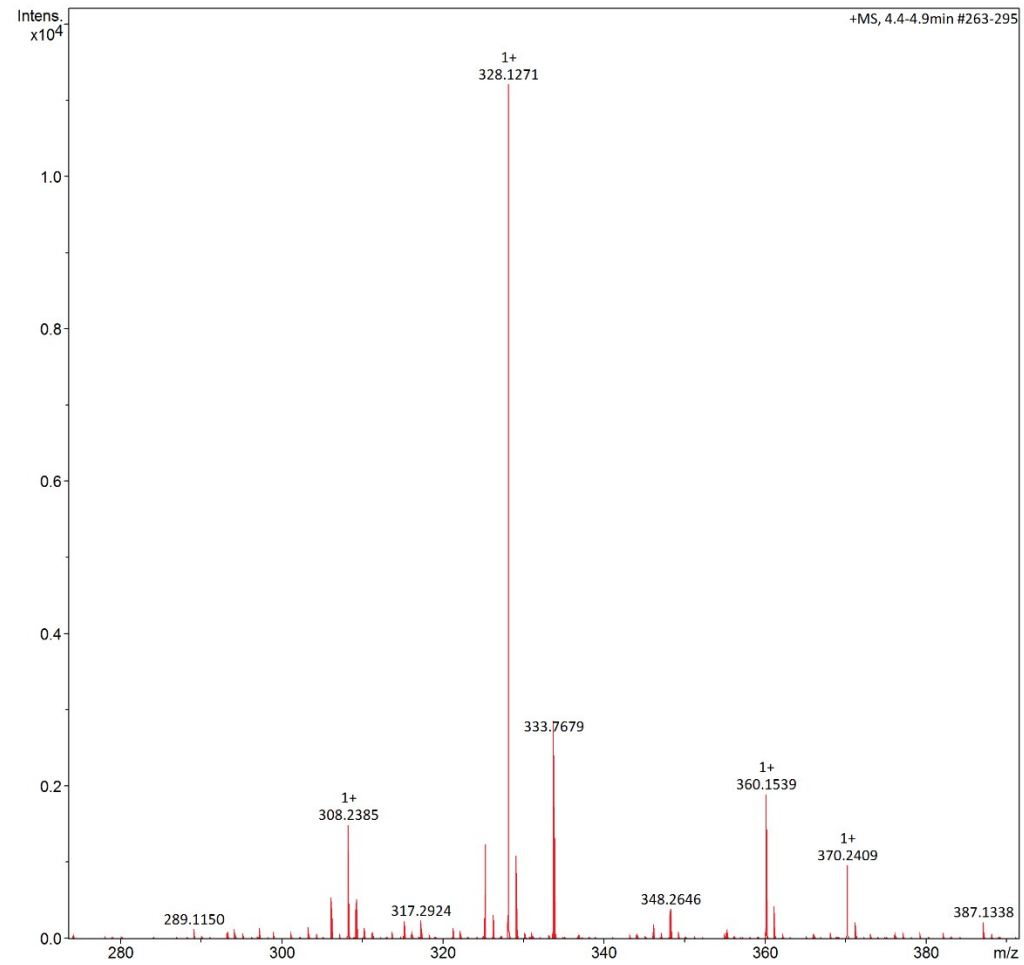

**Fig. S1** HRM (ESI<sup>+</sup>) spectrum of **IE-apa**.

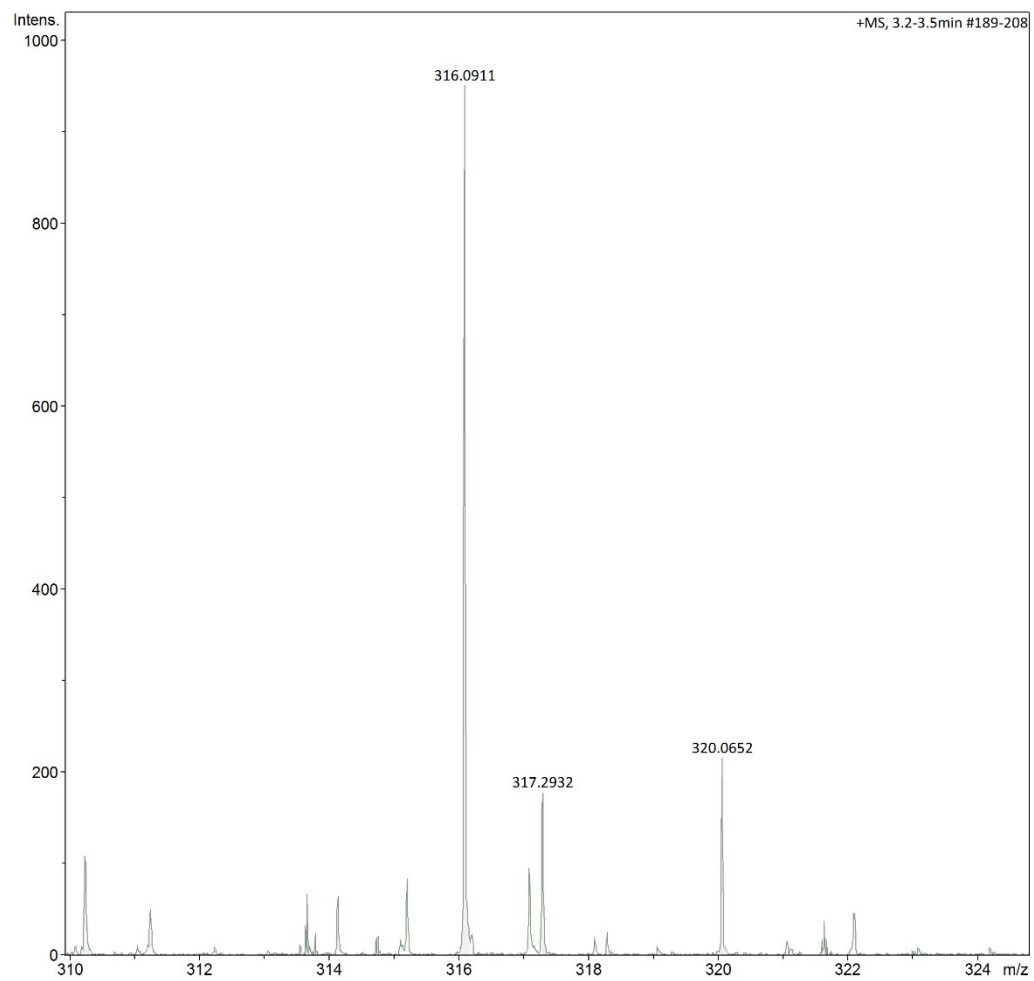

**Fig. S2** HRM (ESI<sup>+</sup>) spectrum of **V-apa**.

**Table S1** Thermal performances of biobased benzoxazine resins from mono-phenols in this work and literatures.

| Raw materials for synthesizing benzoxazine monomer | Solvent                  | $T_g$ (°C) <sup>a</sup> | $T_{di}$ (°C) <sup>d</sup> | Storage Modulus (GPa) <sup>e</sup> | Tensile Strength (MPa) | Tensile modulus (GPa) | Elongation at break (%) | Ref       |
|----------------------------------------------------|--------------------------|-------------------------|----------------------------|------------------------------------|------------------------|-----------------------|-------------------------|-----------|
| Isoeugenol, 3-aminophenylacetylene                 | None                     | 293 <sup>b</sup>        | 395                        | 3.89                               | 66.7<br>±2.2           | 2.20<br>±0.12         | 5.16<br>±0.2            | This work |
| Vanillin, 3-aminophenylacetylene                   | None                     | 304 <sup>b</sup>        | 393                        | 3.65                               | 59.0<br>±3.2           | 1.89<br>±0.18         | 3.98<br>±0.2            | This work |
| Guaiacol, furfurylamine                            | None                     | 82                      | 329                        | NR                                 | NR                     | NR                    | NR                      | S1        |
| Guaiacol, stearylamine                             | None                     | 148                     | 352                        | NR                                 | NR                     | NR                    | NR                      | S1        |
| Arbutin, furfurylamine                             | None                     | 190                     | NR                         | NR                                 | NR                     | NR                    | NR                      | S2        |
| Guaiacol, dehydroabietylamine                      | Dioxane                  | 124                     | 321                        | NR                                 | NR                     | NR                    | NR                      | S3        |
| 4-methylumbelliferone, dehydroabietylamine         | Dioxane                  | 207                     | 362                        | NR                                 | NR                     | NR                    | NR                      | S3        |
| Sesamol, furfurylamine                             | Ethanol or ethyl acetate | NR <sup>c</sup>         | 374                        | NR                                 | NR                     | NR                    | NR                      | S4        |
| Eugenol, stearylamine                              | None                     | 101                     | 313                        | Around <sup>f</sup><br>2.60        | NR                     | NR                    | NR                      | S5        |
| Eugenol, furfurylamine                             | None                     | 148                     | 361                        | Around<br>3.21                     | NR                     | NR                    | NR                      | S5        |
| Eugenol, furfurylamine                             | None                     | 183 <sup>b</sup>        | 338                        | NR                                 | NR                     | NR                    | NR                      | S6        |
| Isoeugenol, furfurylamine                          | None                     | 179 <sup>b</sup>        | 375                        | NR                                 | NR                     | NR                    | NR                      | S6        |
| Cardanol, furfurylamine                            | None                     | NR                      | 374                        | NR                                 | NR                     | NR                    | NR                      | S7        |
| Cardanol, stearylamine                             | None                     | NR                      | 342                        | NR                                 | NR                     | NR                    | NR                      | S7        |
| Umbelliferone, aniline                             | Toluene                  | 183                     | 320                        | NR                                 | NR                     | NR                    | NR                      | S8        |
| Umbelliferone, furfurylamine                       | None                     | NR                      | 420                        | NR                                 | NR                     | NR                    | NR                      | S9        |
| Eugenol, dehydroabietylamine                       | Dioxane                  | 135                     | 341                        | NR                                 | NR                     | NR                    | NR                      | S10       |

|                                                    |                                          |                  |     |             |      |        |      |     |
|----------------------------------------------------|------------------------------------------|------------------|-----|-------------|------|--------|------|-----|
| Eugenol, stearylamine                              | Dioxane                                  | 101              | 316 | NR          | NR   | NR     | NR   | S10 |
| Eugenol, furfurylamine                             | Dioxane                                  | 148              | 375 | NR          | NR   | NR     | NR   | S10 |
| Vanillin, furfurylamine                            | None                                     | 270              | 351 | NR          | NR   | NR     | NR   | S11 |
| Rosin, maleic anhydride, aniline                   | N,N-Dimethylformamide                    | NR               | 353 | NR          | NR   | NR     | NR   | S12 |
| Rosin, maleic anhydride, 4-amiobenzoic acid        | N,N-Dimethylformamide                    | NR               | 321 | NR          | NR   | NR     | NR   | S12 |
| Urushiol, aniline                                  | Dioxane                                  | 140 <sup>b</sup> | 325 | Around 0.60 | 15.3 | 0.0879 | 17.4 | S13 |
| Eugenol, chitosan                                  | Dimethyl sulfoxide                       | 135 <sup>b</sup> | 239 | Around 3.5  | NR   | NR     | NR   | S14 |
| 4-Hydroxyphenyl-10-undecenoate, 10-undecenyl amine | Tetrahydrofuran/dimethyl sulfoxide       | 87 <sup>b</sup>  | 317 | Around 1.69 | NR   | NR     | NR   | S15 |
| Guaiacol, aniline                                  | Ethyl acetate/methanol/chloroform/hexane | NR               | 296 | NR          | NR   | NR     | NR   | S16 |
| Guaiacol, furfurylamine                            | Ethyl acetate/chloroform/hexane          | NR               | 298 | NR          | NR   | NR     | NR   | S16 |
| Guaiacol, aniline                                  | Ethyl acetate/chloroform/hexane          | NR               | 301 | NR          | NR   | NR     | NR   | S16 |
| Phloretic acid, stearylamine                       | Toluene                                  | NR               | 250 | NR          | NR   | NR     | NR   | S17 |
| Phloretic acid, furfurylamine                      | Toluene                                  | NR               | 303 | NR          | NR   | NR     | NR   | S17 |

(a)  $T_g$  was determined by DSC with heated at a rate of 10 °C/min under a N<sub>2</sub> atmosphere.

(b)  $T_g$  was assigned as the temperature at the maximum of tan  $\delta$ -temperature curve from DMA except otherwise stated.

(c) NR = Not reported.

(d)  $T_{di}$  is assigned as the temperature when the weight loss is 5 wt% except otherwise stated.

(e) Storage modulus was tested at 40 °C except otherwise stated.

(f) The datum was estimated from the graph.

## References

- [S1] C. Wang, J. Sun, X. Liu, A. Sudo and T. Endo, *Green Chem.*, 2012, **14**, 2799.
- [S2] L. Dumas, L. Bonnaud, M. Olivier, M. Poorteman and P. Dubois, *Green Chem.*, 2016, **18**, 4954-4960.
- [S3] X. Liu, R. Zhang, T. Li, P. Zhu and Q. Zhuang, *ACS Sustain. Chem. Eng.*, 2017, **5**, 10682-10692.
- [S4] M. L. Salum, D. Iguchi, C. R. Arza, L. Han, H. Ishida and P. Froimowicz, *ACS Sustain. Chem. Eng.*, 2018, **6**, 13096-13106.
- [S5] P. Thirukumaran, A. Shakila Parveen and M. Sarojadevi, *ACS Sustain. Chem. Eng.*, 2014, **2**, 2790-2801.
- [S6] N. Amarnath, S. Shukla and B. Lochab, *ACS Sustain. Chem. Eng.*, 2018, **6**, 15151-15161.
- [S7] P. Thirukumaran, R. Sathiyamoorthi, A. Shakila Parveen and M. Sarojadevi, *Polym. Composite.*, 2016, **37**, 573-582.
- [S8] P. Froimowicz, C. Rodriguez Arza, S. Ohashi and H. Ishida, *J. Polym. Sci. Part A: Polym. Chem.*, 2016, **54**, 1428-1435.
- [S9] P. Froimowicz, R. A. C, L. Han and H. Ishida, *ChemSusChem*, 2016, **9**, 1921-1928.
- [S10] Y. T. Zhang, X. Y. Liu, G. Z. Zhan, Q. X. Zhuang, R. H. Zhang and J. Qian, *Eur. Polym. J.*, 2019, **119**, 477-486.
- [S11] N. K. Sini, J. Bijwe and I. K. Varma, *J. Polym. Sci. Part A: Polym. Chem.*, 2014, **52**, 7-11.
- [S12] S. Li, T. Zou, X. Liu and M. Tao, *Des. Monomers. Polym.*, 2013, **17**, 40-46.
- [S13] H. Xu, Z. Lu and G. Zhang, *RSC Adv.*, 2012, **2**, 2768-2772.
- [S14] P. Thirukumaran, A. Shakila Parveen, R. Atchudan and S.-C. Kim, *Eur. Polym. J.*, 2018, **109**, 248-256.
- [S15] A. Tüzün, G. Lligadas, J. C. Ronda, M. Galià and V. Cádiz, *Eur. Polym. J.*, 2015, **67**, 503-512.
- [S16] J. R. Oliveira, L. R. V. Kotzebue, F. W. M. Ribeiro, B. C. Mota, D. Zampieri, S. E. Mazzetto, H. Ishida and D. Lomonaco, *J. Polym. Sci. Part A: Polym. Chem.*, 2017, **55**, 3534-3544.
- [S17] R. Kirubakaran, P. Sharma, A. Manisekaran, J. Bijwe and L. Nebhani, *J. Therm. Anal. Calorim*, 2020, DOI: 10.1007/s10973-019-09228-y.
